# Supplementary material for: A self-priming mediated chain extension cysteine catalytic oxidation-based colorimetric method for sensitive Pseudomonas aeruginosa detection
Source: Royal Society of Chemistry journal article supplement (doi:10.1039/d5ay00197h), 2025-01-01
Supplement: d5ay00197h1.pdf [file d5ay00197h1.pdf]

## Supporting information

### Supplemented experimental section

#### RCA reaction to produce the ssDNA product

The target sequence and the linear padlock probes were denatured at 95 °C for 5 min before being gradually cooled to room temperature. 1 U of T4 DNA ligase was then added after the mixture had been incubated at 50 °C for 60 min. For 60 min, the ligation mixture was incubated at 30 °C. Then, each reaction received 1 L of an exonuclease mixture containing 1 U of exonuclease I and 0.5 U of exonuclease III. The mixed solution underwent a 1-h incubation period at 37 °C, followed by a 15-min inactivation period at 95 °C. The above-mentioned products were then introduced to RCA reaction system along with 10 µL phi 29 DNA polymerase buffer, 1 mM biotin-labeled primer, 1.5 U phi29 DNA polymerase, 1 mM dNTPs for 90 min and inactivated at 65 °C for 10 min. For additional examination, the end results—long, reduplicated single-strand DNA sequences - that had been biotin labeled at the 5' terminus were employed.

**Table S1.** Sequences used in this research for bacteria detection.

| Title    | Sequences (5' to 3')                                                                                                                                           | Labeling          |
|----------|----------------------------------------------------------------------------------------------------------------------------------------------------------------|-------------------|
| Padlock  | P-CAA GAA AGG AAG CAG GGA CGA AAC GAA CAA<br>AAG CGA AAG GAA AAG CGA AAG CAA CGG GGG<br>TTT TTT TTT TTT TTT TTT TTA CCC CCG TTG CTT<br>TCG CTT AAC GGA TTG AAC |                   |
| s1 chain | TTT TTT TTT AC AAT GTC ACA CGG ATT CA                                                                                                                          | 3'-biotin         |
| LP       | GTT CAA TCC GTT AAG CGA GAA CAA AAC GGA<br>TTG                                                                                                                 |                   |
| F-LP     | GTT CAA TCC GTT AAG CGA GAA CAA AAC GGA<br>TTG                                                                                                                 | 3'-BHQ;<br>5'-FAM |
